# Supplementary material
Source: MDPI journal article supplement (https://www.mdpi.com/2073-4433/13/9/1421)
Supplement: s1 [file s1 › atmosphere-1873758-supplementary.pdf]

## Supplementary Materials:

Rubaiya Kabir <sup>1,\*</sup>, Elizabeth A. Ritchie <sup>1,2,3</sup> and Clair Stark <sup>1</sup>

**Table S1.** Linear Regression Equation and T-test Analysis result for the Bay of Bengal and Arabian Sea to obtain the Combined Intensity Dataset.

| North Indian Ocean (NIO)                             |                         |           |             |           |
|------------------------------------------------------|-------------------------|-----------|-------------|-----------|
|                                                      | Bay of Bengal           |           | Arabian Sea |           |
| Number of Common JTWC Wind and IMD Wind data records | 63                      |           | 15          |           |
|                                                      |                         |           |             |           |
| Regression Statistics                                |                         |           |             |           |
| Multiple R                                           | 0.871                   |           | 0.952       |           |
| R Square                                             | 0.758                   |           | 0.906       |           |
| Adjusted R Square                                    | 0.754                   |           | 0.899       |           |
| Standard Error                                       | 12.739                  |           | 7.893       |           |
|                                                      |                         |           |             |           |
| T –Test Information                                  |                         |           |             |           |
|                                                      | IMD Data                | JTWC Data | IMD Data    | JTWC Data |
| Mean                                                 | 51.62                   | 47.14     | 53.91       | 46.64     |
| Standard Deviation                                   | 25.69                   | 28.35     | 24.87       | 26.66     |
| Observations                                         | 63                      | 63        | 15          | 15        |
| Pearson Correlation                                  | 0.87                    |           | 0.95        |           |
| Hypothesized Mean Difference                         | 0                       |           | 0           |           |
| df                                                   | 63                      |           | 15          |           |
| t Stat                                               | 2.54                    |           | 3.44        |           |
| P(T<=t) one-tail                                     | 0.007                   |           | 0.002       |           |
| t Critical one-tail                                  | 1.67                    |           | 1.76        |           |
| Result                                               | Significant at p < 0.05 |           |             |           |

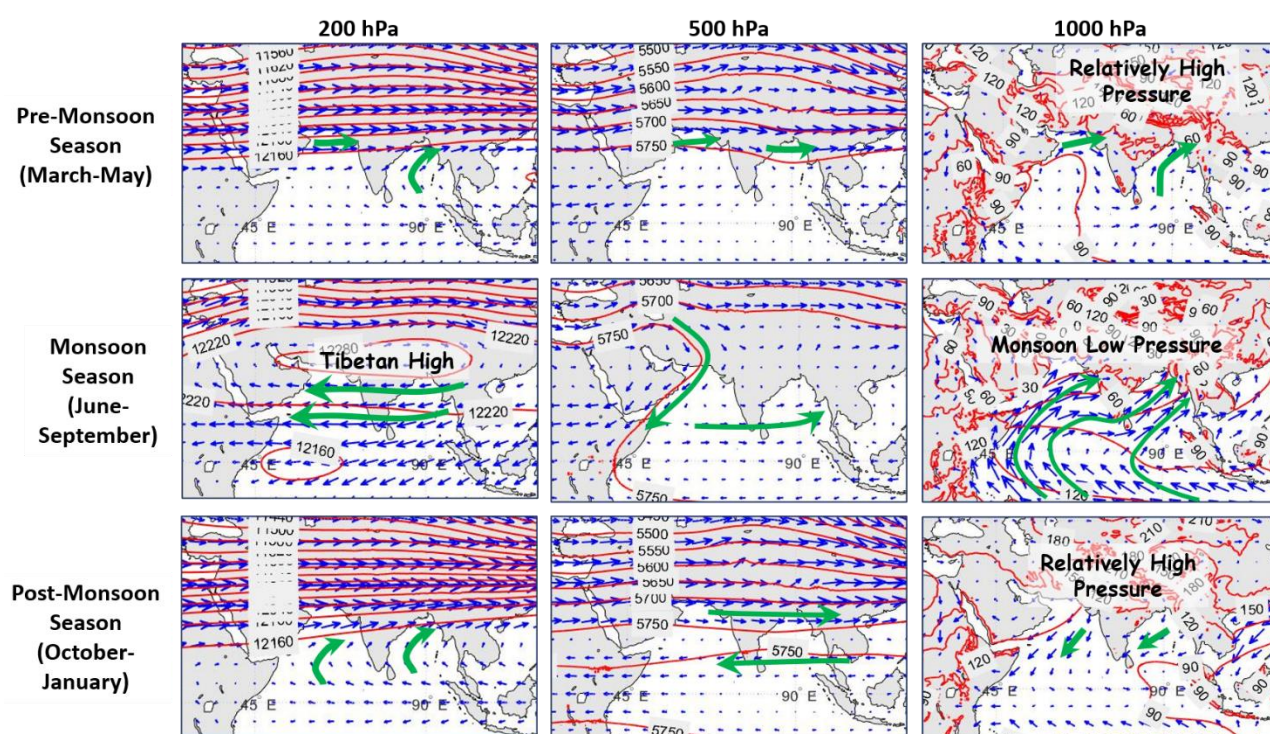

**Figure S1.** Geopotential height and wind circulation for the Pre-monsoon (Top row), Monsoon (Middle row) and Post-monsoon (bottom row) seasons at 200 hPa (left column); 500 hPa (middle column) and 1000 hPa (right column).

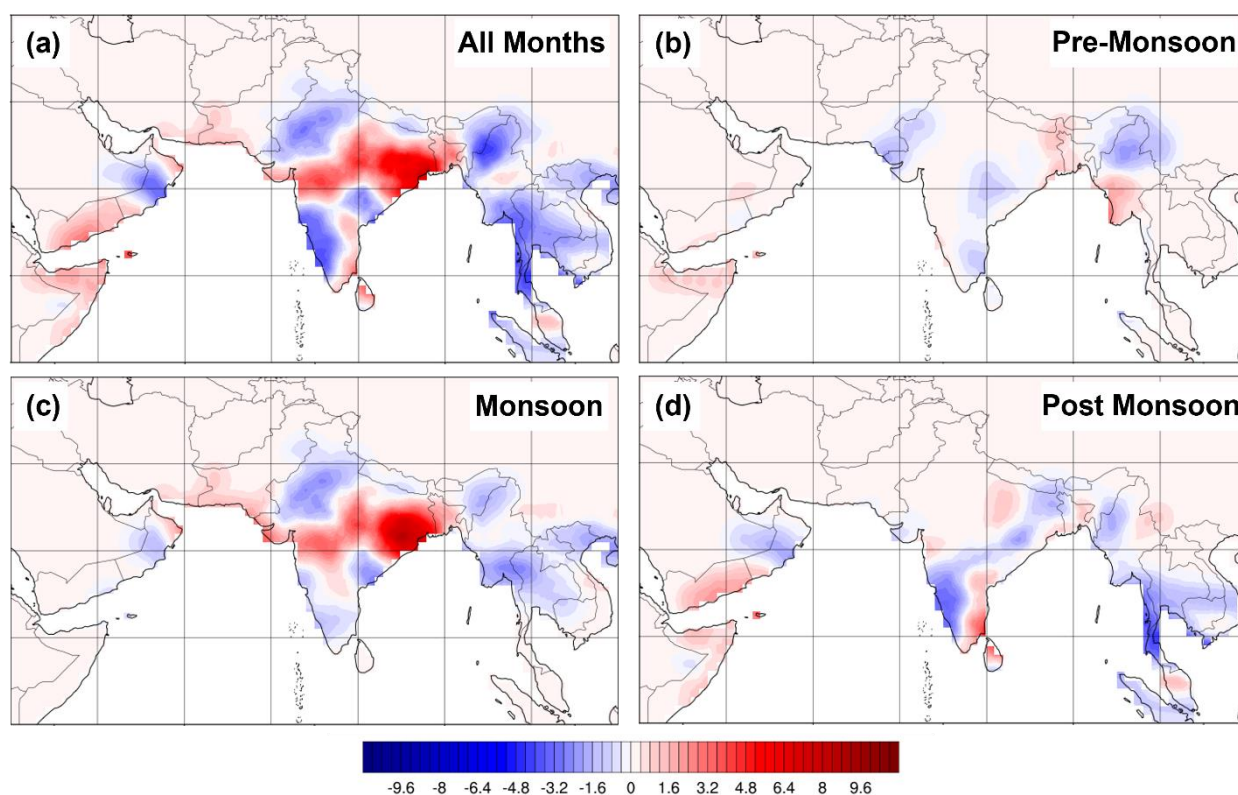

**Figure S2.** Difference between the EARLY (1989–2003) and LATE (2004–2018) periods for: (a) All Months; (b) Pre-Monsoon period (March–May); (c) Monsoon period (June–September); and (d) Post Monsoon period (October–January). Density Maps are calculated at 0.1° resolution.

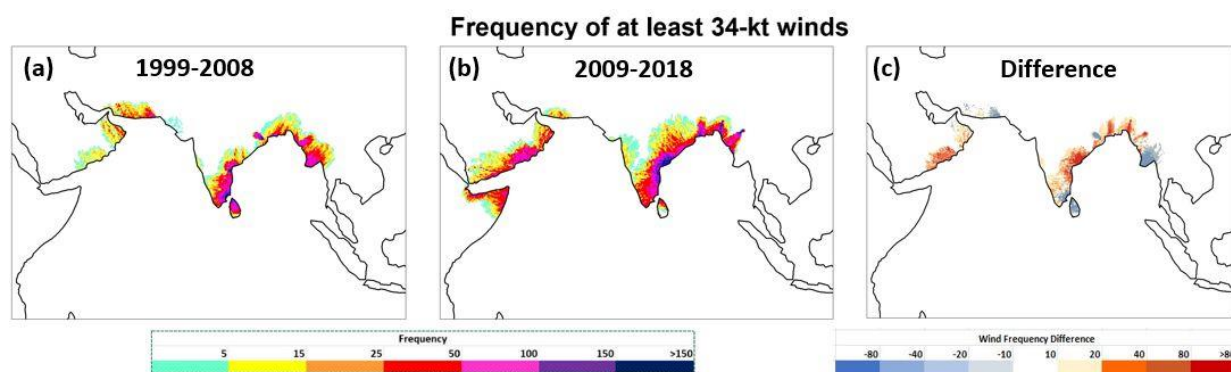

**Figure S3.** (a) EARLY (1999–2008); (b) LATE (2009–2018), and (c) Difference between the EARLY and LATE periods for the frequency of at least 34-kt winds after TC landfall. Density Maps are calculated at  $0.1^\circ$  resolution.

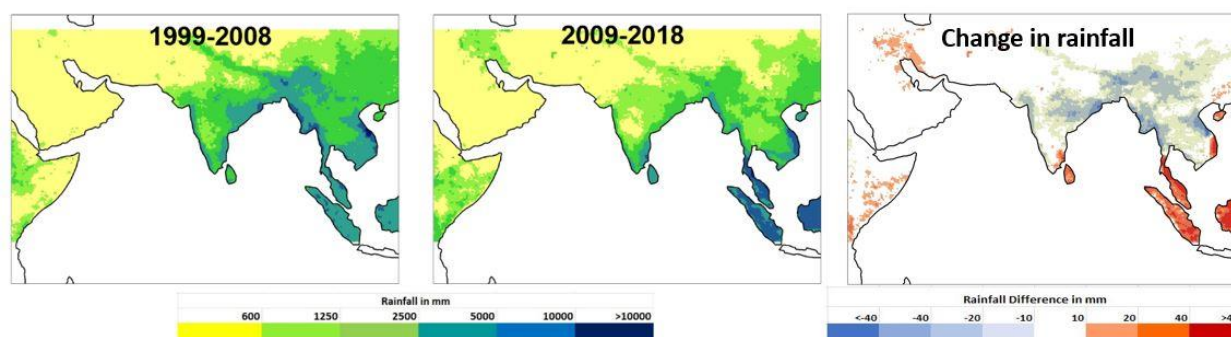

**Figure S4.** Extent of over land rainfall (mm) for the two 10-year periods: (a) 1999 to 2008; (b) 2009 to 2018; and (c) their difference.

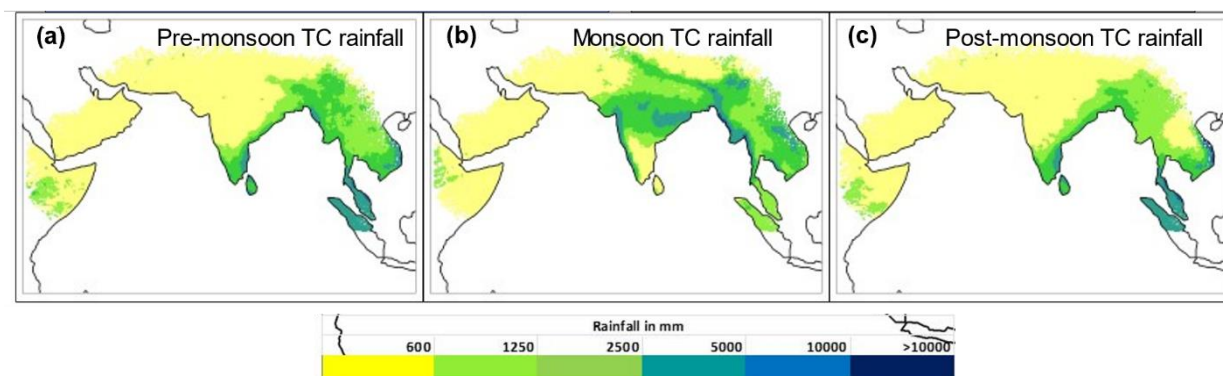

**Figure S5.** Extent of over land TC rainfall (mm) by monsoon period for the 20 years from 1999 to 2018 for: (a) the pre-monsoon; (b) main monsoon period; and (c) post monsoon.
